# Supplementary material for: The impact of resolution on meteorological, chemical and aerosol properties in regional simulations with WRF-Chem
Source: Copernicus journal article supplement (doi:10.5194/acp-17-1511-2017), 2017-01-31

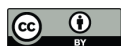

*Supplement of*

## **The impact of resolution on meteorological, chemical and aerosol properties in regional simulations with WRF-Chem**

**Paola Crippa et al.**

*Correspondence to:* Paola Crippa ([paola.crippa@ncl.ac.uk](mailto:paola.crippa@ncl.ac.uk))

The copyright of individual parts of the supplement might differ from the CC-BY 3.0 licence.

Table S1. Ratio of spatial variability (i.e. the standard deviation of AOD computed across all grid cells) between AOD at wavelengths ( $\lambda$ ) of 470, 550 and 660 nm from MODIS observations mapped at 60 km and WRF-Chem simulations conducted at 60 km resolution (WRF60, shown in the table as -60), at 12 km resolution (WRF12, shown in the table as -12), and from WRF-Chem simulations at 12 km but remapped to 60 km (WRF12-remap, shown in the table as -remap). Given WRF12-remap is obtained by averaging WRF12 when at least half of the 5×5 12 km resolution cells contain valid data, the ratio of standard deviations from WRF60 and WRF12-remap may be computed on slightly different observations and sample size. The yellow shading shows for each month and  $\lambda$  the model with ratio of standard deviations closer to 1.

| Month→/<br>Variable↓ | Jan   | Feb   | Mar   | Apr   | May   | Jun   | Jul   | Aug   | Sep   | Oct   | Nov   | Dec   |
|----------------------|-------|-------|-------|-------|-------|-------|-------|-------|-------|-------|-------|-------|
| 470-12               | 0.489 | 0.581 | 0.382 | 0.595 | 0.806 | 0.802 | 1.033 | 1.20  | 1.935 | 1.698 | 0.766 | 0.457 |
| 470-60               | 0.615 | 0.717 | 0.682 | 0.648 | 0.556 | 0.331 | 0.353 | 0.291 | 0.541 | 0.605 | 0.562 | 0.564 |
| 470-remap            | 0.522 | 0.630 | 0.380 | 0.644 | 0.993 | 0.791 | 1.018 | 1.194 | 2.079 | 2.099 | 0.853 | 0.512 |
| 550-12               | 0.406 | 0.475 | 0.307 | 0.480 | 0.630 | 0.690 | 0.996 | 1.106 | 1.709 | 1.401 | 0.663 | 0.370 |
| 550-60               | 0.578 | 0.663 | 0.629 | 0.624 | 0.502 | 0.302 | 0.327 | 0.274 | 0.480 | 0.525 | 0.518 | 0.505 |
| 550-remap            | 0.431 | 0.503 | 0.299 | 0.524 | 0.764 | 0.693 | 0.990 | 1.110 | 1.872 | 1.758 | 0.745 | 0.396 |
| 660-12               | 0.401 | 0.454 | 0.283 | 0.462 | 0.571 | 0.671 | 1.004 | 1.114 | 1.684 | 1.343 | 0.665 | 0.351 |
| 660-60               | 0.458 | 0.531 | 0.497 | 0.462 | 0.378 | 0.214 | 0.225 | 0.184 | 0.328 | 0.391 | 0.402 | 0.405 |
| 660-remap            | 0.342 | 0.393 | 0.235 | 0.391 | 0.553 | 0.474 | 0.676 | 0.777 | 1.369 | 1.331 | 0.557 | 0.307 |

Table S2. Spatial coherence in the identification of hourly precipitation between WRF-Chem at different resolutions relative to MERRA-2. The Hit Rate (*HR*) indicates the probability of correct forecast and is the proportion of cells correctly identified as with precipitation by both WRF-Chem and MERRA-2. The Mean Fractional Bias (MFB) in space is also reported for each month and computed from the hourly precipitation rates. The yellow shading indicates the model resolution with highest HR and lower absolute MFB in each month for precipitation.

| Month→/<br>Metric↓ | Jan    | Feb    | Mar    | Apr    | May    | Jun    | Jul    | Aug    | Sep    | Oct    | Nov    | Dec    |
|--------------------|--------|--------|--------|--------|--------|--------|--------|--------|--------|--------|--------|--------|
| HR-60              | 0.344  | 0.298  | 0.228  | 0.122  | 0.083  | 0.072  | 0.057  | 0.059  | 0.067  | 0.078  | 0.154  | 0.218  |
| HR-remap           | 0.698  | 0.715  | 0.680  | 0.539  | 0.402  | 0.440  | 0.479  | 0.438  | 0.438  | 0.454  | 0.581  | 0.666  |
| MFB-60             | -0.340 | -0.347 | -0.384 | -0.442 | -0.462 | -0.468 | -0.475 | -0.474 | -0.469 | -0.459 | -0.423 | -0.385 |
| MFB-12             | -0.095 | -0.068 | -0.065 | -0.168 | -0.273 | -0.269 | -0.260 | -0.274 | -0.281 | -0.261 | -0.170 | -0.119 |

Figure S1. Seasonal mean of hourly temperature at 2 meters [K] from MERRA-2 (first row), WRF60 (second row), and WRF12-remap (third row), for simultaneous data from all three datasets.

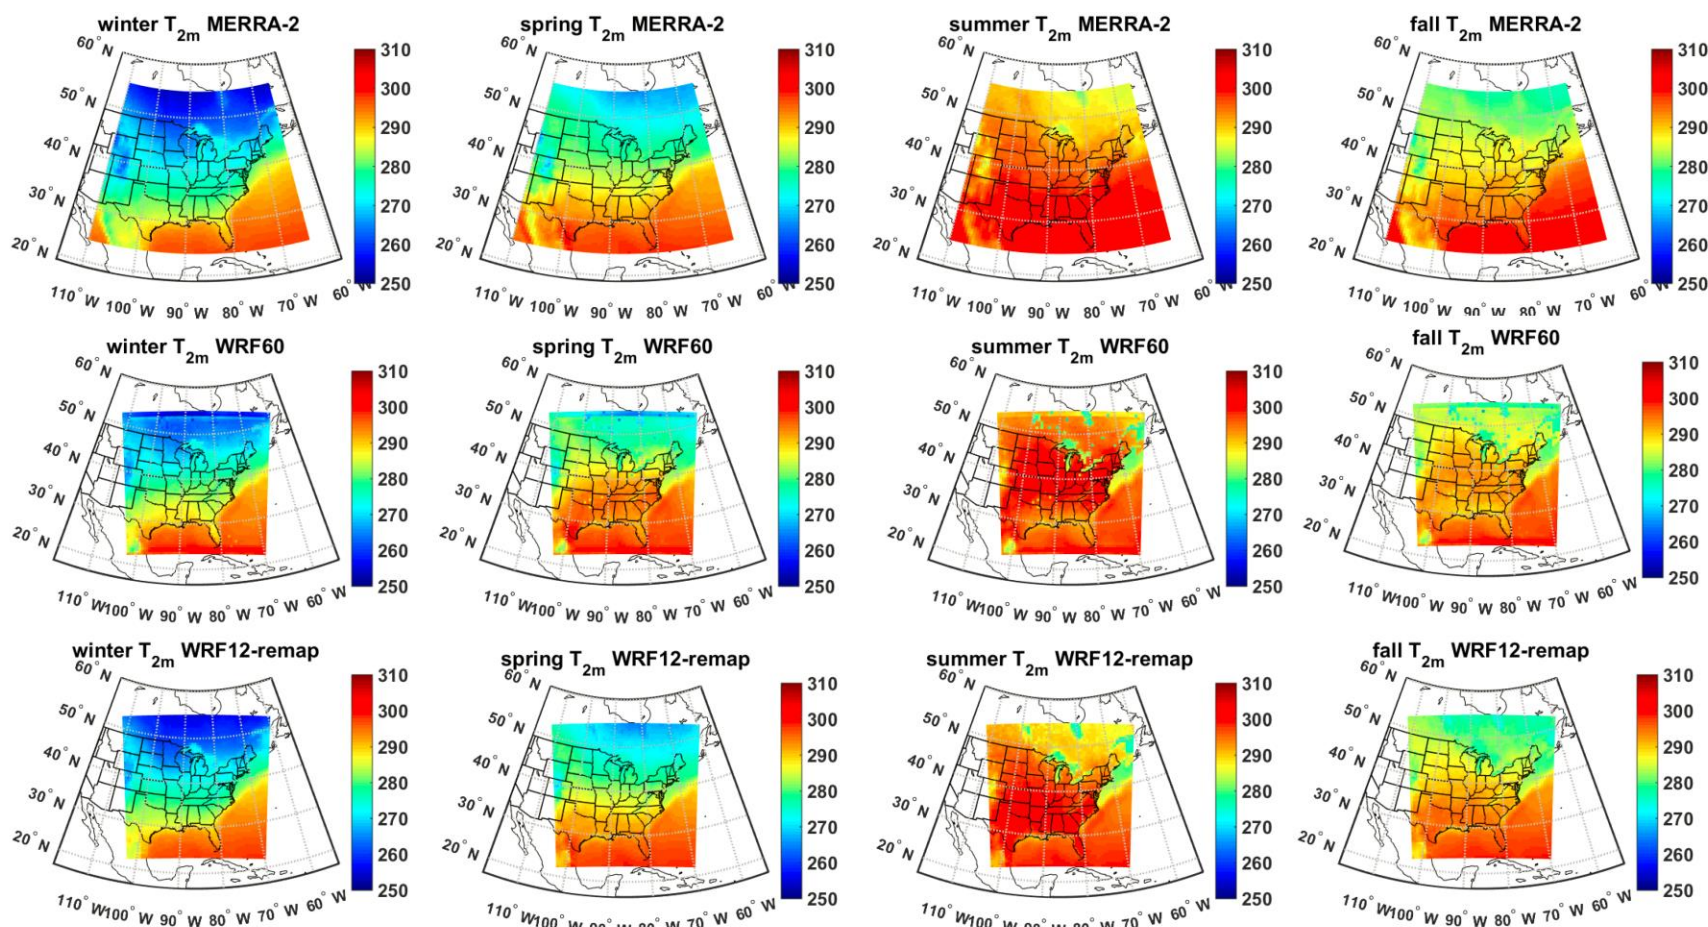



Figure S2. Seasonal average of hourly Planetary Boundary Layer Height, *PBLH* [m] from MERRA-2 (first row), WRF60 (second row), and WRF12-remap (third row), for simultaneous hours of the three datasets.

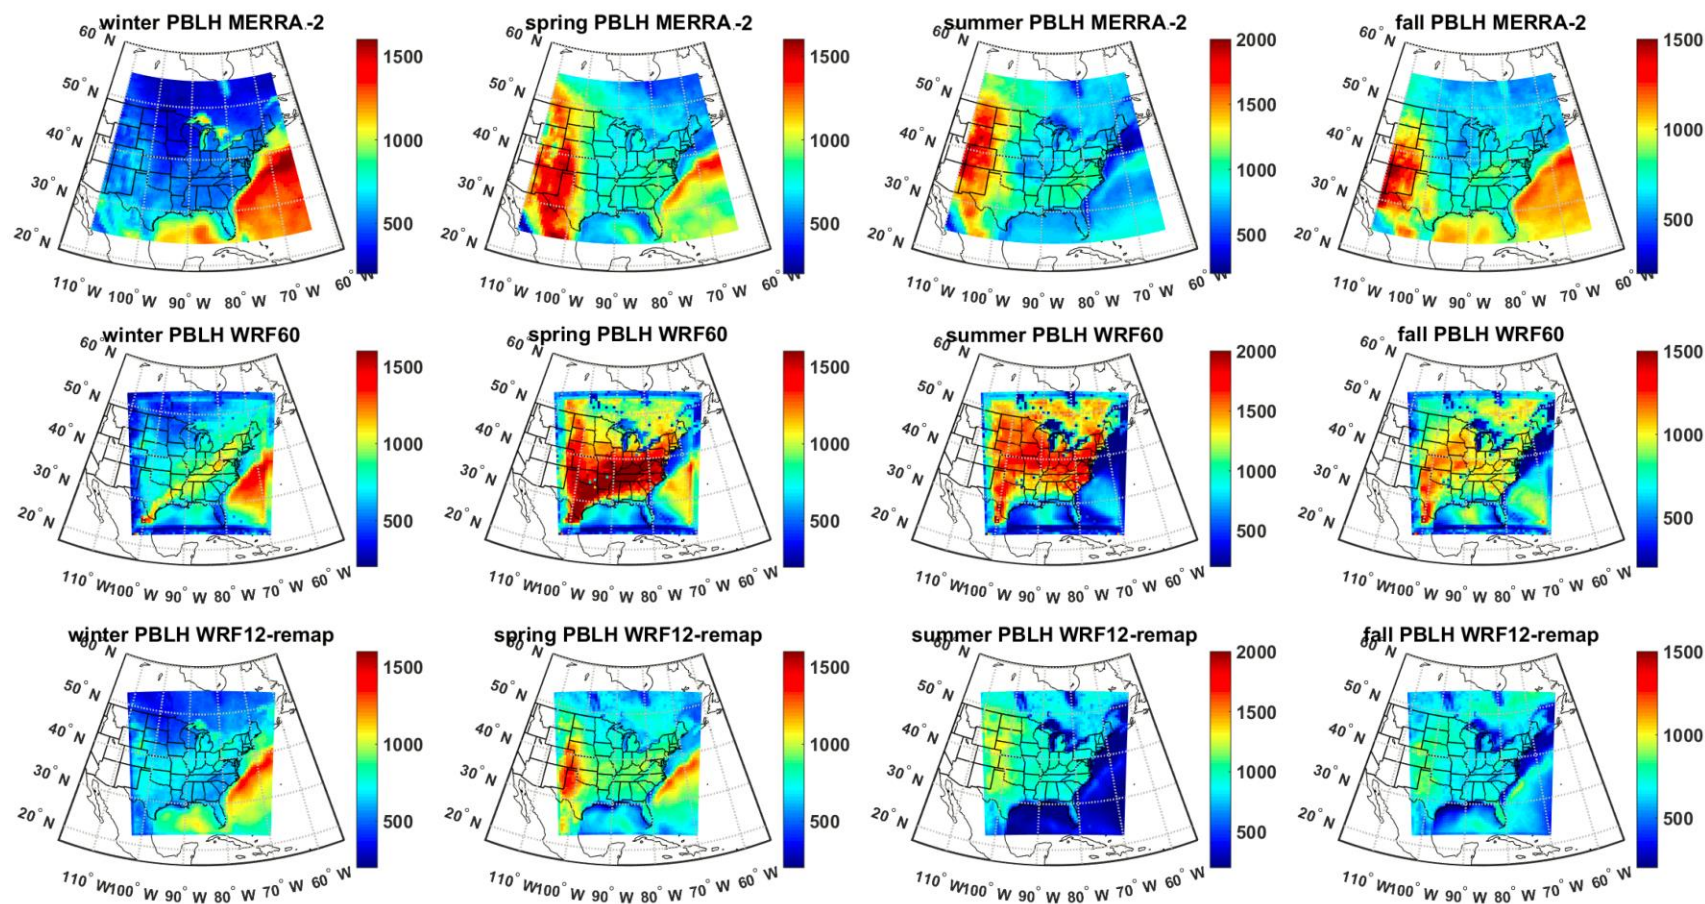

Figure S3. Seasonal total precipitation (mm) from MERRA-2 (first row), WRF60 (second row), and WRF12-remap (third row).

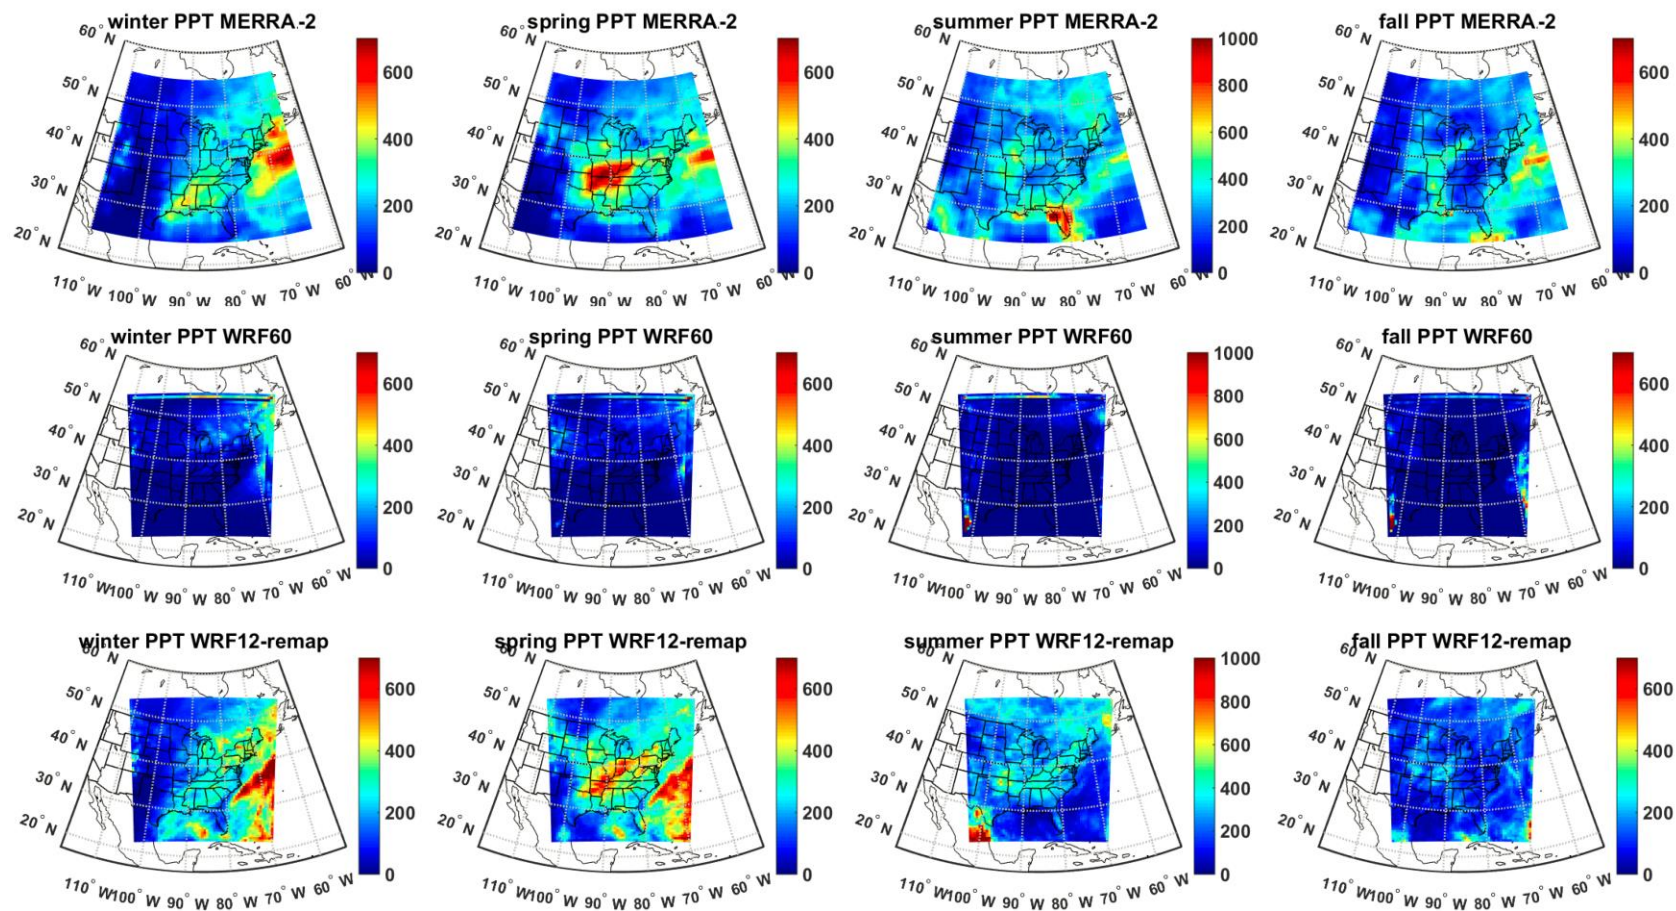



Figure S4. Seasonal total column SO<sub>2</sub> z-scores from OMI (first row), WRF60 (second row), and WRF12-remap (third row). z-scores are computed relative to the spatial seasonal mean of each dataset and indicate the distance from the mean in terms of standard deviation units. A cloud screen of 0.3 is applied to both satellite observations and simulated values. Only grid cells with at least 5 valid observations in a month are used to compute a mean value, otherwise the grid cell is shown as white.

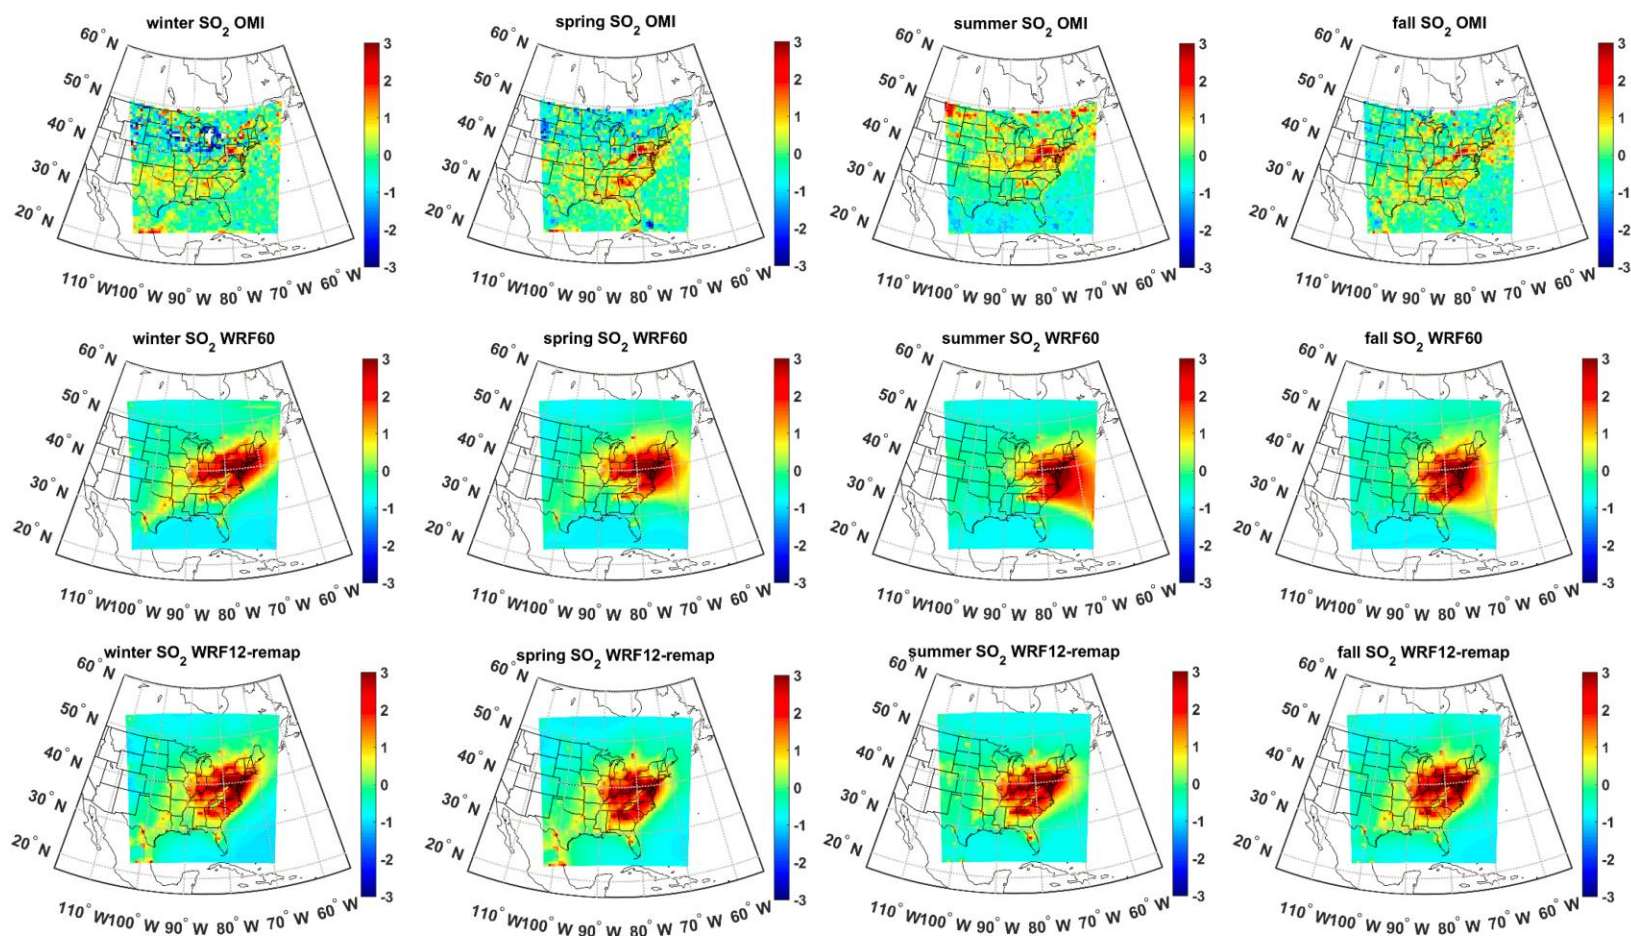

Figure S5. Seasonal total column NO<sub>2</sub> z-scores from OMI (first row), WRF60 (second row), and WRF12-remap (third row). z-scores are computed relative to the spatial seasonal mean of each dataset and indicate the distance from the mean in terms of standard deviation units. A cloud screen of 0.3 is applied to both satellite observations and simulated values. Only grid cells with at least 5 valid observations in a month are used to compute a mean value, otherwise the grid cell is shown as white.

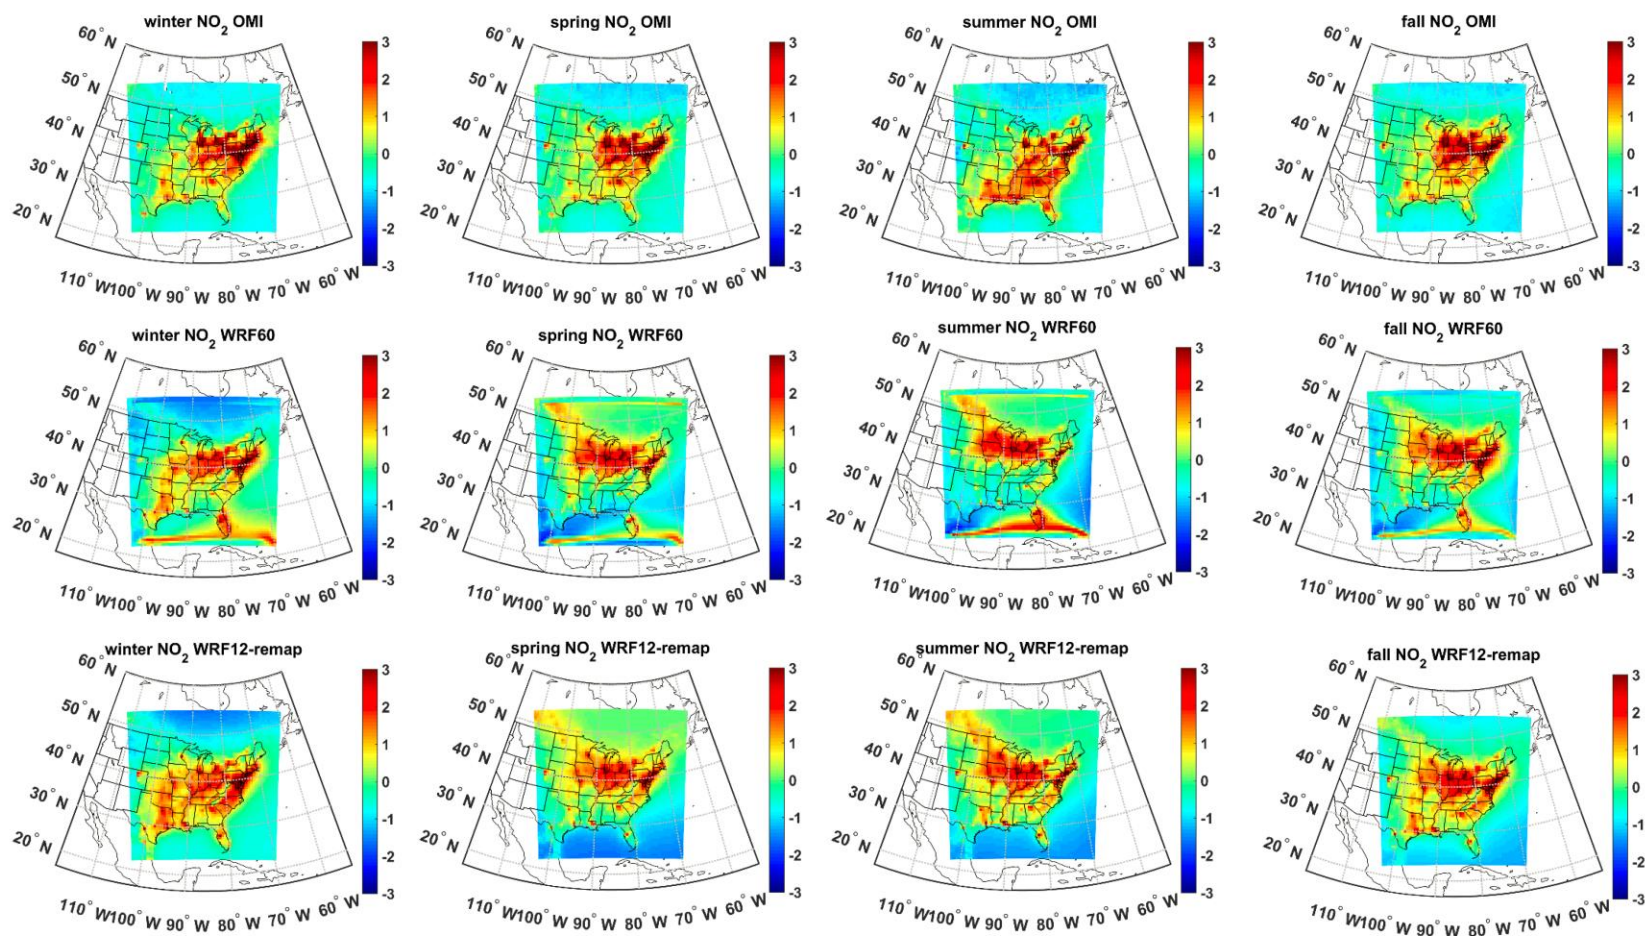



Figure S6. Seasonal total column  $\text{NH}_3$  z-scores from OMI (first row), WRF60 (second row), and WRF12-remap (third row). z-scores are computed relative to the spatial seasonal mean of each dataset and indicate the distance from the mean in terms of standard deviation units. A cloud screen of 0.3 is applied to both satellite observations and simulated values. Only grid cells with at least 5 valid observations in a month are used to compute a mean value, otherwise the grid cell is shown as white.

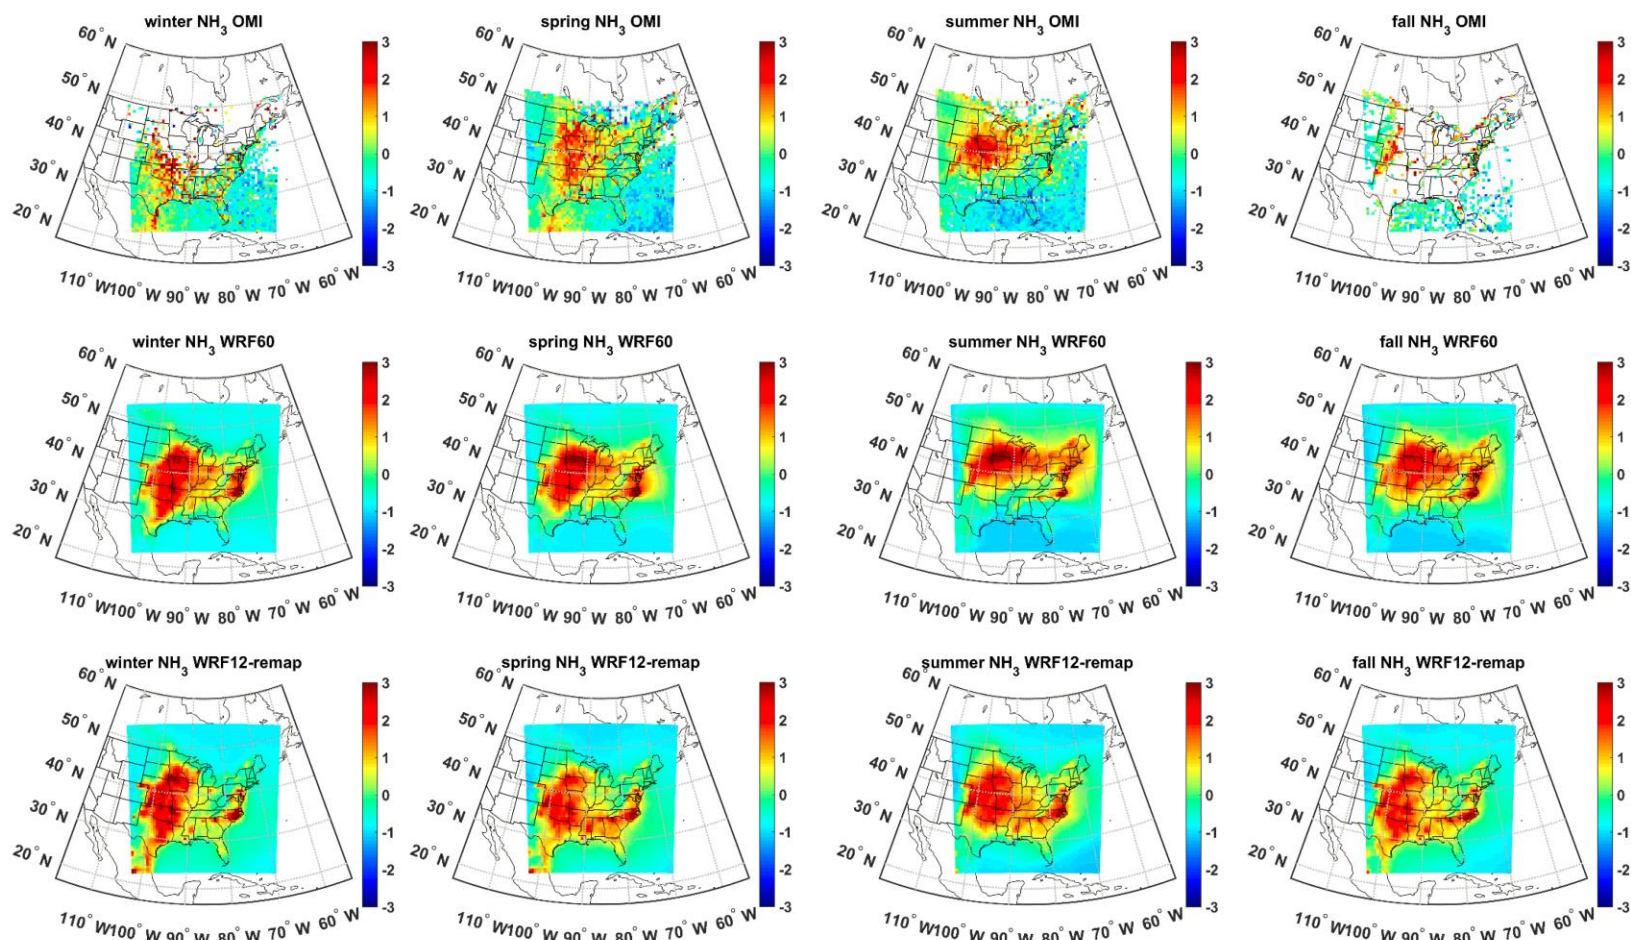

Figure S7. Seasonal total column HCHO z-scores from OMI (first row), WRF60 (second row), and WRF12-remap (third row). z-scores are computed relative to the spatial seasonal mean of each dataset and indicate the distance from the mean in terms of standard deviation units. A cloud screen of 0.3 is applied to both satellite observations and simulated values. Only grid cells with at least 5 valid observations in a month are used to compute a mean value, otherwise the grid cell is shown as white.

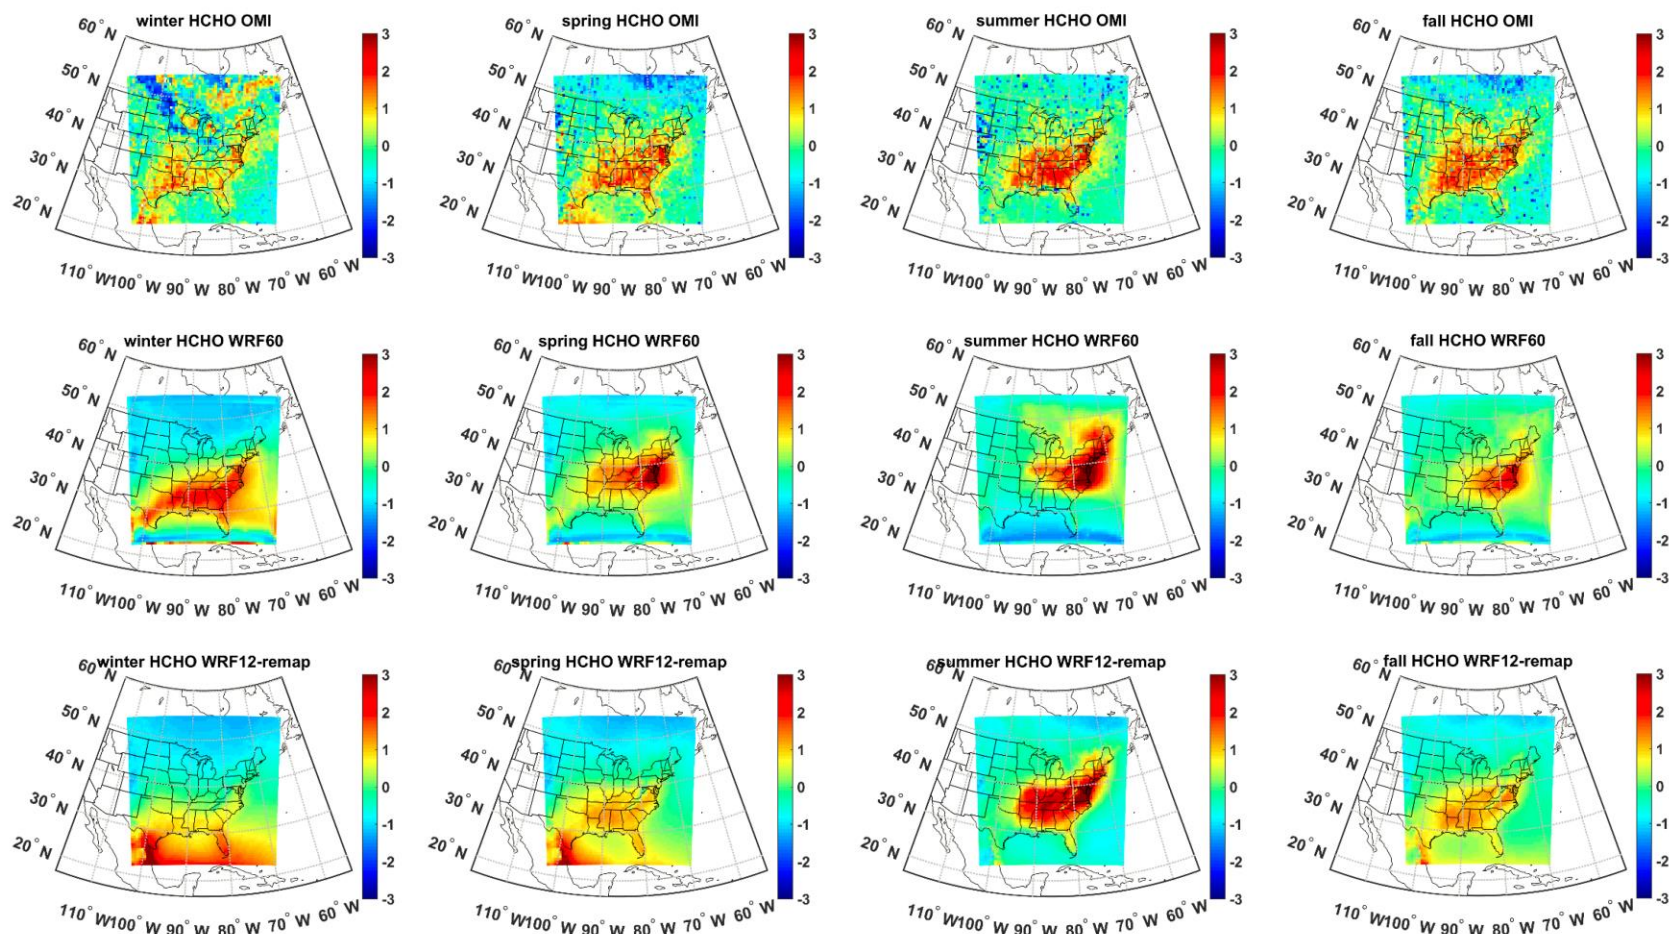

Supplement: Supplementary file 1 [file acp-17-1511-2017-supplement.pdf]
